# Supplementary material for: Methyl Parathion Exposure Induces Development Toxicity and Cardiotoxicity in Zebrafish Embryos
Source: MDPI journal article supplement (doi:10.3390/toxics11010084), 2023-01-15
Supplement: s1 [file s1]

# Supplementary Materials: Methyl Parathion Exposure Induces Development Toxicity and Cardiotoxicity in Zebrafish Embryos

**Table S1.** Morphological abnormalities of embryos treated with 0, 2.5 and 10-mg/L concentrations of methyl parathion at 72 hpf. A, B, C represents three repetitions per concentration.

| Morphological abnormalities | Repeating group | Treatment (72hpf) |                 |               |                |
|-----------------------------|-----------------|-------------------|-----------------|---------------|----------------|
|                             |                 | 0 mg/L (N=30)     | 2.5 mg/L (N=30) | 5 mg/L (N=30) | 10 mg/L (N=30) |
| Pericardial edema           | A               | 0 (0%)            | 4 (13.3%)       | 14 (46.7%)    | 26 (86.7%)     |
|                             | B               | 0 (0%)            | 3 (10%)         | 8 (26.7%)     | 25 (83.3%)     |
|                             | C               | 0 (0%)            | 3 (10%)         | 10 (33.3%)    | 25 (83.3%)     |
| Cardiac bleeding            | A               | 0 (0%)            | 0 (0%)          | 2 (6.7%)      | 7 (23.3%)      |
|                             | B               | 0 (0%)            | 0 (0%)          | 2 (6.7%)      | 9 (30%)        |
|                             | C               | 0 (0%)            | 0 (0%)          | 0 (0%)        | 8 (26.7%)      |
| Spinal curvature            | A               | 0 (0%)            | 1 (3.3%)        | 0 (0%)        | 23 (76.7%)     |
|                             | B               | 0 (0%)            | 0 (0%)          | 5 (16.7%)     | 25 (83.3%)     |
|                             | C               | 0 (0%)            | 0 (0%)          | 0 (0%)        | 20 (66.7%)     |

**Table S2.** Sequences of primer pairs used in the real-time quantitative PCR reaction.

| Target gene    | GenBank Acc number | Primer sequence (5'-3')                                      | Amplicon length |
|----------------|--------------------|--------------------------------------------------------------|-----------------|
| <i>β-actin</i> | NM_131031.2        | F: AGGTCATCACCATCGGCAAT<br>R: GATGTCCACGTCGCACTTCA           | 131             |
| <i>vmhc</i>    | NM_001112733.1     | F: TGATATCGAGCGCAAAGTAGCCG<br>R: CTGGATCTCCATCTCATTCAAGGTCG  | 175             |
| <i>sox9b</i>   | NM_001044780.1     | F: TGACGAGTTGTTCTCCAGAG<br>R: AGGCCACACGTCTATAACCC           | 261             |
| <i>nppa</i>    | NM_198800.3        | F: GGATTTGACACACAGAGAAATCGCC<br>R: TTGCAGCTAACCTTTTTAGAGTTGC | 144             |
| <i>bmp2b</i>   | NM_131360.2        | F: GAAAGCTTCGACGTGGGTTTCAG<br>R: GTTCGAATGCAAGACGGCTGTG      | 246             |
| <i>bmp4</i>    | NM_131342.2        | F: AGCACGTCAGCTTCGACTATCC<br>R: GCGTCATCTATTTGTTGCCTG        | 209             |
| <i>tnnt2</i>   | NM_152893.1        | F: CAGAATTGAGAAGCGTCGTTCG<br>R: TTTGCATGTAACCGCCGAAGTG       | 191             |
| <i>p53</i>     | NM_001328587.1     | F: TGCTTGAAGAACAGCCTCAGCCAT<br>R: TATTCAGGTCCGGTGAATAAGTGCA  | 153             |
| <i>bax</i>     | NM_131562.2        | F: GCGATACGGGCAGTGGCAATG<br>R: GCGTTTATGGCTGGGGTCACAC        | 158             |
| <i>bcl2</i>    | NM_001030253.2     | F: TGGCGTCCCAGGTAGATAATATTGC<br>R: CGCAGAGGCTGTCACTTCTGAGC   | 235             |
